# Supplementary material for: Formation of a p–n heterojunction on GaP photocathodes for H2production providing an open-circuit voltage of 710 mV
Source: Royal Society of Chemistry journal article supplement (doi:10.1039/c4ta00752b), 2014-01-01
Supplement: c4ta00752b1.pdf [file c4ta00752b1.pdf]

# Forming a p-n Heterojunction on GaP Photocathodes for H<sub>2</sub> Production Providing an Open-Circuit Voltage of 710 mV

Mauro Malizia, Brian Seger, Ib Chorkendorff, and Peter C. K. Vesborg\*

CINF, Department of Physics, Technical University of Denmark, DTU

Building 311, Fysikvej, DK-2800 Kgs. Lyngby, Denmark

E-mail: peter.vesborg@fysik.dtu.dk

## Electronic Supplementary Information

## UV-Vis Spectroscopy

The absorption spectra for  $\text{TiO}_2$  and  $\text{Nb}_2\text{O}_5$  films are shown in Figure S1. A considerably high absorption in the visible light region is observed for the  $\text{Nb}_2\text{O}_5$  film. This is most likely due to the presence of Nb in metallic phase, not completely oxidized during the deposition. For  $\text{TiO}_2$  and  $\text{Nb}_2\text{O}_5$  the bandgaps are found to be 3.1 eV and 3.5 eV, respectively, as depicted in the inset of Figure S1.

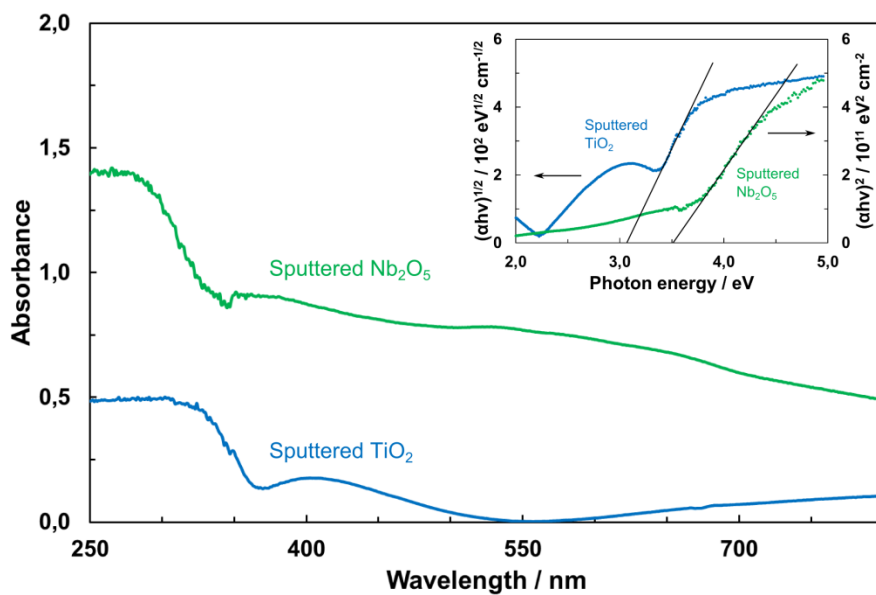

Figure S1: Absorption spectra for  $\text{TiO}_2$  and  $\text{Nb}_2\text{O}_5$  sputtered on quartz glass. Inset: Tauc plot for  $\text{TiO}_2$  and  $\text{Nb}_2\text{O}_5$ .

## X-ray Diffraction

The XRD data of both the  $\text{TiO}_2$  and  $\text{Nb}_2\text{O}_5$  films is shown in Figure S2. The peaks of the  $\text{TiO}_2$  at  $25.5^\circ$ ,  $38.6^\circ$ ,  $56.2^\circ$ , and  $63.8^\circ$  correspond to anatase. The peak at  $32^\circ$  and  $52^\circ$ , and  $67^\circ$  are undefined peaks, but may be related to the underlying Si support. The extremely broad peaks of the  $\text{Nb}_2\text{O}_5$  sample give little useful information. However without clear sharp peaks, it is evident that the  $\text{Nb}_2\text{O}_5$  has, at most, a minimal degree of crystallinity.

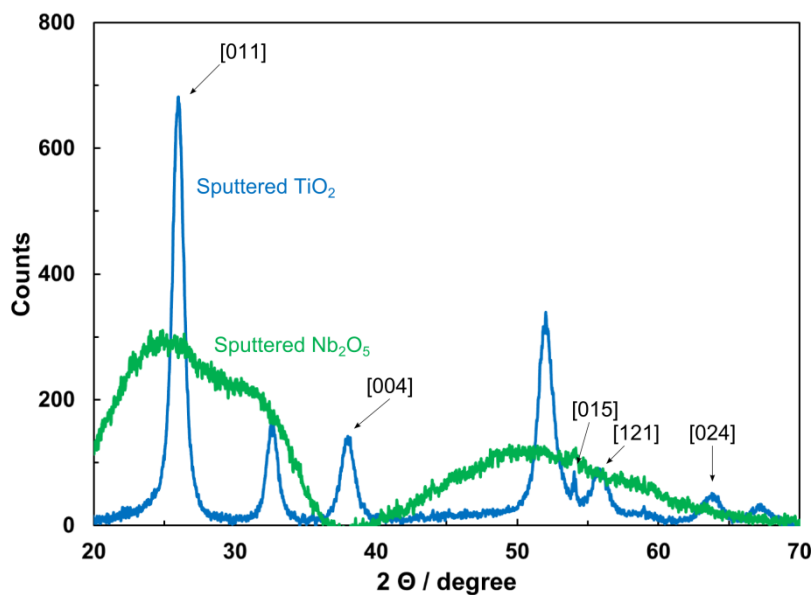

Figure S2: Cu  $K\alpha$  XRD peaks of  $\text{TiO}_2$  and  $\text{Nb}_2\text{O}_5$  sputtered on Si substrate showing the anatase structure of  $\text{TiO}_2$  and the amorphous phase of  $\text{Nb}_2\text{O}_5$ .

## Electrochemical Impedance Spectroscopy

The positioning of flat band potential of GaP, TiO<sub>2</sub> and Nb<sub>2</sub>O<sub>5</sub> was determined by electrochemical impedance spectroscopy (EIS) using the Mott-Schottky relationship<sup>1</sup> expressed in the following Equation

$$\frac{1}{C^{-2}} = \frac{2}{e\epsilon_r\epsilon_0 A^2 N} \left( E - E_{FB} - \frac{k_B T}{e} \right) \quad (1)$$

where C is the space-charge region capacitance, e is the electronic charge,  $\epsilon_r$  is the relative permittivity,  $\epsilon_0$  is the vacuum permittivity, A is the electrode surface area, N is the number of donors or acceptors, E is the applied voltage,  $E_{FB}$  is the flat band potential,  $k_B$  is Boltzmann's constant, and T is the temperature. Some assumption are made in the derivation of the Mott-Schottky equation, thus a standard nonlinear relationship between  $C^{-2}$  and E may not be observed if such assumptions are not fulfilled (*i.e.* space-charge region capacitance  $\ll$  Helmholtz layer capacitance, absence of surface states, frequency-independence of the dielectric constant  $\epsilon_r$ , homogeneous spatial distribution of donors/acceptors, flat surface).<sup>1,2</sup>

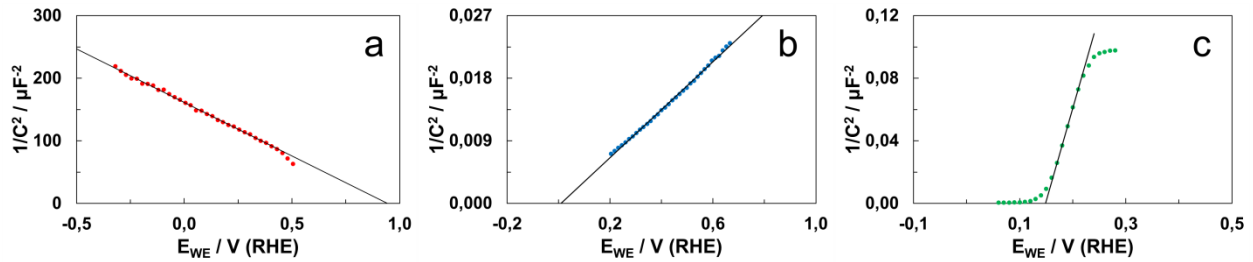

Figure S3: Mott-Schottky plot for (a) p-GaP, (b) n-TiO<sub>2</sub> and (c) n-Nb<sub>2</sub>O<sub>5</sub> on Si substrate, measured using a modulation frequency of 1 kHz in 1 M HClO<sub>4</sub> in dark conditions.

The Mott-Schottky plot for p-GaP is shown in Figure S3a. By using Equation 1 and  $\epsilon_r=11.1$ ,<sup>3</sup> the flat band potential was found to be  $E_{FB}=0.92 \text{ V}_{RHE}$  and the acceptors concentration was found to be  $N_A=5.6 \cdot 10^{17} \text{ cm}^{-3}$ . Mott-Schottky plots of the sputtered TiO<sub>2</sub> and Nb<sub>2</sub>O<sub>5</sub> films deposited on Si are shown in Figures S3b and S3c. For TiO<sub>2</sub>,  $\epsilon_r$  is 75,<sup>4</sup> while  $E_{FB}$  was calculated to be  $-0.02 \text{ V}_{RHE}$ .  $N_D$  is dependent upon the surface area, and SEM images have shown that the sputtered TiO<sub>2</sub> is quite rough.<sup>5</sup> If only the geometric area is taken into consideration,  $N_D$  would be  $5 \cdot 10^{20} \text{ cm}^{-3}$ . However, it should be noted that using a surface roughness of 3.2 or 10 would correspond to an  $N_D$

of  $5 \cdot 10^{19} \text{ cm}^{-3}$  or  $5 \cdot 10^{18} \text{ cm}^{-3}$ , respectively. Determining the exact surface roughness and the effect of surface roughness on the Mott-Schottky impedance data is beyond the scope of this work. However, we can reasonably estimate that the actual donor density will be somewhere between  $5 \cdot 10^{18} \text{ cm}^{-3}$  and  $5 \cdot 10^{20}$ .

For  $\text{Nb}_2\text{O}_5$  ( $\epsilon_r=42$ ),<sup>5</sup>  $E_{\text{FB}}$  was calculated to be 0.12  $V_{\text{RHE}}$ . Again, the rough surface of the sputtered  $\text{Nb}_2\text{O}_5$  made determining an effective surface area difficult. Using the same approach of  $\text{TiO}_2$ , we could estimate the  $N_D$  of  $\text{Nb}_2\text{O}_5$  to be somewhere between  $4 \cdot 10^{20} \text{ cm}^{-3}$  and  $4 \cdot 10^{18} \text{ cm}^{-3}$ . Both metal oxides are n-type and characterized by a high donor density. The high donor density often introduces error for the determination of  $E_{\text{FB}}$  and carrier concentration due to the magnitude of the capacitance of the Helmholtz layer. Therefore, this can result in nonlinearity of the Mott-Schottky plot.<sup>6</sup>

We found an apparent  $E_{\text{FB}}$  for  $\text{Nb}_2\text{O}_5$  that is more positive than the one of  $\text{TiO}_2$ , although the majority of studies on  $\text{Nb}_2\text{O}_5$  place the value more negative than the one of  $\text{TiO}_2$ .<sup>7</sup>

The carrier density found in our  $\text{Nb}_2\text{O}_5$  film is comparable to the carrier density reported for similar amorphous thin films, which indicates a highly disordered structure and probably a considerable presence of defects.<sup>8</sup>

## References

- (1) Cardon, F., Gomes, W. P., J. Phys. D: Appl. Phys., **1978**, *11*, L63-L67
- (2) De Gryse, R.; Gomes, W. P.; Cardon, F., Vennik, J., J. Electrochem. Soc., **1975**, *122*, 711-712
- (3) Samara, G. A. Phys. Rev. B, **1983**, *27*, 3494-3505
- (4) King D. M., Du X., Cavanagh A. S., Weimer A., Nanotechnology, **2008**, *19*, 445401-445406
- (5) Seger, B.; Pedersen, T.; Laursen, A. B.; Vesborg, P. C. K.; Hansen, O., Chorkendorff, I., J. Am. Chem. Soc., **2013**, *135*, 1057-1064
- (6) Di Quarto, F.; La Mantia, F., Santamaria, M., Electrochim. Acta, **2005**, *50*, 5090-5102
- (7) Alibabaei, L.; Luo, H.; House, R. L.; Hoertz, P. G.; Lopez, R., Meyer, T. J., J. Mater. Chem. A, **2013**, *1*, 4133-4145
- (8) Wang, W., Alfantazi, A., J. Electrochem. Soc., **2013**, *160*, C1-C11
